# Supplementary material
Source: PubMed Central journal article supplement (PMC5014542)
Supplement: NIHMS767913-supplement-2.pdf [file NIHMS767913-supplement-2.pdf]

Corresponding Author: Henry Yin

Manuscript Number: NN-A52252

Manuscript Type: Article

# Main Figures: 7

# Supplementary Figures: 13

# Supplementary Tables: 0

# Supplementary Videos: 4

## Reporting Checklist for Nature Neuroscience

This checklist is used to ensure good reporting standards and to improve the reproducibility of published results. For more information, please read [Reporting Life Sciences Research](#).

Please note that in the event of publication, it is mandatory that authors include all relevant methodological and statistical information in the manuscript.

### ► Statistics reporting, by figure

- Please specify the following information for each panel reporting quantitative data, and where each item is reported (section, e.g. Results, & paragraph number).
- Each figure legend should ideally contain an exact sample size (n) for each experimental group/condition, where n is an exact number and not a range, a clear definition of how n is defined (for example x cells from x slices from x animals from x litters, collected over x days), a description of the statistical test used, the results of the tests, any descriptive statistics and clearly defined error bars if applicable.
- For any experiments using custom statistics, please indicate the test used and stats obtained for each experiment.
- Each figure legend should include a statement of how many times the experiment shown was replicated in the lab; the details of sample collection should be sufficiently clear so that the replicability of the experiment is obvious to the reader.
- For experiments reported in the text but not in the figures, please use the paragraph number instead of the figure number.

**Note:** Mean and standard deviation are not appropriate on small samples, and plotting independent data points is usually more informative. When technical replicates are reported, error and significance measures reflect the experimental variability and not the variability of the biological process; it is misleading not to state this clearly.

|         | TEST USED       |                 | n                     |              |                                    | DESCRIPTIVE STATS (AVERAGE, VARIANCE) |                             | P VALUE               |             | DEGREES OF FREEDOM & F/t/z/R/ETC VALUE |                 |                       |
|---------|-----------------|-----------------|-----------------------|--------------|------------------------------------|---------------------------------------|-----------------------------|-----------------------|-------------|----------------------------------------|-----------------|-----------------------|
|         | FIGURE NUMBER   | WHICH TEST?     | SECTION & PARAGRAPH # | EXACT VALUE  | DEFINED?                           | SECTION & PARAGRAPH #                 | REPORTED?                   | SECTION & PARAGRAPH # | EXACT VALUE | SECTION & PARAGRAPH #                  | VALUE           | SECTION & PARAGRAPH # |
| example | 1a              | one-way ANOVA   | Fig. legend           | 9, 9, 10, 15 | mice from at least 3 litters/group | Methods para 8                        | error bars are mean +/- SEM | Fig. legend           | p = 0.044   | Fig. legend                            | F(3, 36) = 2.97 | Fig. legend           |
| example | results, para 6 | unpaired t-test | Results para 6        | 15           | slices from 10 mice                | Results para 6                        | error bars are mean +/- SEM | Results para 6        | p = 0.0006  | Results para 6                         | t(28) = 2.808   | Results para 6        |
| + -     |                 |                 |                       |              |                                    |                                       |                             |                       |             |                                        |                 |                       |

|               |             | TEST USED                                           |                 | n                         |                                                                                     |                                   | DESCRIPTIVE STATS (AVERAGE, VARIANCE)                            |             | P VALUE               |                                | DEGREES OF FREEDOM & F/t/z/R/ETC VALUE |                 |
|---------------|-------------|-----------------------------------------------------|-----------------|---------------------------|-------------------------------------------------------------------------------------|-----------------------------------|------------------------------------------------------------------|-------------|-----------------------|--------------------------------|----------------------------------------|-----------------|
| FIGURE NUMBER | WHICH TEST? | SECTION & PARAGRAPH #                               | EXACT VALUE     | DEFINED?                  | SECTION & PARAGRAPH #                                                               | REPORTED?                         | SECTION & PARAGRAPH #                                            | EXACT VALUE | SECTION & PARAGRAPH # | VALUE                          | SECTION & PARAGRAPH #                  |                 |
| +<br>-        | 1C          | correlation                                         | results para 2  | 40                        | binned lick rate and binned spike rate                                              | results para 2                    | no                                                               | 1.53e-19    | results para 2        | r (38) = 0.94                  | results para 2                         |                 |
| +<br>-        | 1f          | correlation                                         | results para 3  | 40                        | binned lick rate and binned spike rate                                              | results para 2                    | no                                                               | 8.38e-15    | results para 3        | r (38) = -0.89                 | results para 3                         |                 |
| +<br>-        | 2d          | Chi square                                          | results para 4  | 87 SNR units; 74 SC units | units recorded from 6 mice (SNR) and 4 mice (SC)                                    | Methods para 1 and results para 4 | no                                                               | 1.9e10-5    | results para 4        | $\chi^2$ (1) = 18.31           | results para 4                         |                 |
| +<br>-        | 2e          | Chi square                                          | Results para 5  | 87 SNR units; 74 SC units | units recorded from 6 mice (SNR) and 4 mice (SC)                                    | Methods para 1 and results para 5 | no                                                               | 9.2e-7      | results para 5        | $\chi^2$ (1) = 24.08           | results para 5                         |                 |
| +<br>-        | S4b         | one-way ANOVA                                       | Fig. legend     | 14                        | 14 hemispheres from 7 mice                                                          | Fig legend                        | error bars are mean +/- sem                                      | Fig legend  | 6.36e-5               | fig legend                     | f (2,26) = 22.24                       | fig legend      |
| +<br>-        | 5h          | one-way ANOVA                                       | results para 11 | 7                         | mice                                                                                | fig legend                        | error bars are mean +/- sem                                      | fig legend  | 5.42e-10              | fig legend and results para 11 | f (6, 36) = 19.55                      | results para 11 |
| +<br>-        | 6h          | one way anova                                       | results para 16 | 3                         | mice                                                                                | results para 13 and Fig legend    | error bars are mean +/- sem                                      | fig legend  | 0.0035                | results para 16                | f (6, 12) = 6.29                       | results para 16 |
| +<br>-        | 6i          | one way anova                                       | results para 16 | 135                       | single units from 3 mice and 7 stimulation conditions                               | Fig legend                        | error bars are mean +/- sem                                      | fig legend  | 7.12e-7               | results para 16 and fig legend | f (6, 134) = 7.37                      | results para 16 |
| +<br>-        | 7b          | paired t test                                       | results para 16 | 11                        | light responsive units from 3 mice. planned comparison pre vs stim and stim vs post | results para 16                   | error bars are mean +/- sem; individual data points are overlaid | fig legend  | 2.19e-13<br>7.93e-7   | results para 16 and fig legend | t (10) = 50.62<br>t (10) = 10.78       | results para 16 |
| +<br>-        | 7f          | t test                                              | fig legend      | 36                        | trials from one mouse                                                               | fig legend                        | error bars are mean +/- sem                                      | fig legend  | 0.0005                | fig legend                     | t (34) = 3.85                          | fig legend      |
| +<br>-        | 7i          | t test with welch's correction for unequal variance | fig legend      | 36                        | trials from one mouse                                                               | fig legend                        | error bars are mean +/- sem                                      | fig legend  | 5.31e-7               | fig legend                     | t (31) = 6.27                          | fig legend      |
| +<br>-        | S1e         | Mann-Whitney U                                      | Results para 2  | 25                        | testing sessions from 6 mice (SNR) and 4 mice (SC)                                  | Fig legend                        | error bars are mean +/- sem                                      | fig legend  | 0.5287                | Fig legend                     | U = 65.00                              | Fig legend      |
| +<br>-        | S1f         | Mann-Whitney U                                      | Results para 2  | 25                        | testing sessions from 6 mice (SNR) and 4 mice (SC)                                  | Fig Legend                        | error bars are mean +/- sem                                      | fig legend  | 0.3823                | Fig Legend                     | U = 72.50                              | Fig legend      |
| +<br>-        | S5a         | one way anova                                       | fig legend      | 7                         | mice                                                                                | fig legend                        | error bars are mean +/- sem                                      | fig legend  | 0.2071                | fig legend                     | f (6,36) = 1.50                        | fig legend      |
| +<br>-        | S5b         | one way anova                                       | fig legend      | 7                         | mice                                                                                | fig legend                        | error bars are mean +/- sem                                      | fig legend  | 0.0002                | fig legend                     | f (6,36) = 5.91                        | fig legend      |

|        |      |                             |                 |    |                                                                                                 |                 |                             |            |                                                                                                                   |                 |                                                                                                                                                 |                 |
|--------|------|-----------------------------|-----------------|----|-------------------------------------------------------------------------------------------------|-----------------|-----------------------------|------------|-------------------------------------------------------------------------------------------------------------------|-----------------|-------------------------------------------------------------------------------------------------------------------------------------------------|-----------------|
| +<br>- | S5c  | one way anova               | fig legend      | 7  | mice                                                                                            | fig legend      | error bars are mean +/- sem | fig legend | 0.0437                                                                                                            | fig legend      | f (6,36) = 2.45                                                                                                                                 | fig legend      |
| +<br>- | S5f  | two-way ANOVA               | fig legend      | 7  | mice, 7 stimulation conditions per mouse                                                        | fig legend      | error bars are mean +/- sem | fig legend | 6.90e-6; 7.62e-5; 0.0031                                                                                          | fig legend      | main effect of Frequency F(6,42) = 8.18; main effect of Motivation F(1,42) = 19.23; interaction between Frequency and Motivation F(6,42) = 3.97 | fig legend      |
| +<br>- | S6b  | one way anova               | fig legend      | 6  | mice                                                                                            | Fig legend      | error bars are mean +/- sem | fig legend | 0.18                                                                                                              | fig legend      | f (6,30) = 1.59                                                                                                                                 | fig legend      |
| +<br>- | S7c  | two way anova               | fig legend      | 11 | mice from two groups (7 Chr2, 4 eYFP)                                                           | Fig legend      | error bars are mean +/- sem | fig legend | 0.13; 0.20; 0.59                                                                                                  | fig legend      | no main effect of Group, F(1,36) = 2.66; no main effect of Frequency, F(4,36) = 1.56; no interaction between Group and Frequency F(4,36) = 0.71 | fig legend      |
| +<br>- | S11b | one way anova               | fig legend      | 18 | single units from 3 mice                                                                        | fig legend      | error bars are mean +/- sem | fig legend | 5.36e-8                                                                                                           | fig legend      | F (6,102) = 9.14                                                                                                                                | fig legend      |
| +<br>- | S3d  | t-test                      | fig legend      | 12 | mice from two groups (6 sham, 6 lesion)                                                         | fig legend      | error bars are mean +/- sem | fig legend | 0.45                                                                                                              | fig legend      | t (10) = 0.79                                                                                                                                   | fig legend      |
| +<br>- | S3e  | t-test                      | fig legend      | 12 | mice from two groups (6 sham, 6 lesion)                                                         | fig legend      | error bars are mean +/- sem | fig legend | 0.02                                                                                                              | fig legend      | t (10) = 2.77                                                                                                                                   | fig legend      |
| +<br>- | S5d  | one way anova               | fig legend      | 7  | mice                                                                                            | fig legend      | error bars are mean +/- sem | fig legend | 0.36                                                                                                              | fig legend      | F (6,36) = 1.13                                                                                                                                 | fig legend      |
| +<br>- | S5e  | one way anova               | fig legend      | 7  | mice                                                                                            | fig legend      | error bars are mean +/- sem | fig legend | 0.0045                                                                                                            | fig legend      | F (6,36) = 3.86                                                                                                                                 | fig legend      |
| +<br>- | S10b | one way anova               | fig legend      | 6  | mice                                                                                            | fig legend      | error bars are mean +/- sem | fig legend | 0.06                                                                                                              | fig legend      | F (6,30) = 2.26                                                                                                                                 | fig legend      |
| +<br>- | S10e | one way anova               | fig legend      | 5  | mice                                                                                            | fig legend      | error bars are mean +/- sem | fig legend | 0.23                                                                                                              | fig legend      | F (6,24) = 1.46                                                                                                                                 | fig legend      |
| +<br>- | S13h | Mann-Whitney U              | fig legend      | 72 | neurons from 3 mice in 7 conditions (BL=28, 3Hz=8, 10Hz=8, 50Hz=8, 100Hz=8, 1s On =7, 2s On =5) | fig legend      | error bars are mean +/- sem | fig legend | BL vs. 3Hz: 0.66; BL vs. 10Hz: 0.09; BL vs. 50Hz: 0.56; BL vs. 100Hz: 0.02; BL vs. 1s On: 0.02; BL vs 2s On: 0.90 | fig legend      | BL vs. 3Hz: U=100; BL vs. 10Hz: U=67; BL vs. 50Hz: U=96; BL vs. 100Hz: U=52; BL vs. 1s On: U=42; BL vs 2s On: U=67                              | fig legend      |
| +<br>- | S13k | Chi square                  | fig legend      | 40 | neurons from two conditions (BL=20, Stim=20)                                                    | fig legend      | n/a                         | n/a        | 0.03                                                                                                              | fig legend      | $\chi^2$ (1) = 4.91                                                                                                                             | fig legend      |
| +<br>- | 3c   | one-way ANOVA               | Results para. 7 | 4  | Mice, three conditions each                                                                     | fig legend      | error bars are mean +/- sem | fig legend | 0.019                                                                                                             | Results para. 7 | F (2,6) = 8.24                                                                                                                                  | results para. 7 |
| +<br>- | 3d   | two way anova (Time x Dose) | fig legend      | 4  | Mice, three conditions each                                                                     | fig legend      | error bars are mean +/- sem | fig legend | 0.0007, 1.53e-4, 0.33                                                                                             | fig legend      | main effect of Time F(7,48) = 3.75; main effect of Dose, F(2,48) = 12.95; no interaction F(14,48) = 1.16                                        | fig legend      |
| +<br>- | 3e   | one way anova               | results para 7  | 3  | Mice, three conditions each                                                                     | results para. 7 | error bars are mean +/- sem | fig legend | 0.008                                                                                                             | results para. 7 | f (2,8) = 20.42                                                                                                                                 | results para. 7 |

|        |     |                                   |                 |   |                                              |                 |                             |            |                         |                 |                                                                                                                                                                                                                           |                 |
|--------|-----|-----------------------------------|-----------------|---|----------------------------------------------|-----------------|-----------------------------|------------|-------------------------|-----------------|---------------------------------------------------------------------------------------------------------------------------------------------------------------------------------------------------------------------------|-----------------|
| +<br>- | 3f  | one way anova                     | results para. 7 | 3 | Mice, three conditions each                  | results para. 7 | error bars are mean +/- sem | fig legend | 0.41                    | results para. 7 | f (2,8) = 1.12                                                                                                                                                                                                            | results para. 7 |
| +<br>- | S8b | two way anova (group x frequency) | fig legend      | 8 | mice from two groups (n=5 chr2, n=3 control) | fig legend      | error bars are mean +/- sem | fig legend | 0.0013; 0.0256; 0.1726. | fig legend      | main effect of Group, F (1, 30) = 32.42, p = 0.0013; main effect of Stimulation Frequency, F (5, 30) = 3.01, p = 0.0256; no interaction between Group and Stimulation Frequency, F (5, 30) = 1.669, p = 0.1726.           | fig legend      |
| +<br>- | S8c | two way anova (group x frequency) | fig legend      | 8 | mice from two groups (n=5 chr2, n=3 control) | fig legend      | error bars are mean +/- sem | fig legend | 0.4203; 0.065; 0.2542   | fig legend      | no main effect of Group, F (1, 30) = 0.7483, p = 0.4203; no main effect of Stimulation Frequency, F (5, 30) = 2.35, p = 0.065; no interaction between Group and Stimulation Frequency, F (5, 30) = 1.395, p = 0.2542.     | fig legend      |
| +<br>- | S8d | two way anova (group x frequency) | fig legend      | 8 | mice from two groups (n=5 chr2, n=3 control) | fig legend      | error bars are mean +/- sem | fig legend | 0.5594; 0.9175; 0.7694  | fig legend      | no main effect of Group, F (1, 30) = 0.3818, p = 0.5594; no main effect of Stimulation Frequency, F (5, 30) = 0.2852, p = 0.9175; no interaction between Group and Stimulation Frequency, F (5, 30) = 0.5059, p = 0.7694. | fig legend      |

## ► Representative figures

1. Are any representative images shown (including Western blots and immunohistochemistry/staining) in the paper?

If so, what figure(s)?

yes

Fig. 4; 6b,d-g; S1a,b; S3a; S9a

2. For each representative image, is there a clear statement of how many times this experiment was successfully repeated and a discussion of any limitations in repeatability?

If so, where is this reported (section, paragraph #)?

yes, in corresponding figure legends

## ► Statistics and general methods

1. Is there a justification of the sample size?  
If so, how was it justified?  
Where (section, paragraph #)?  
Even if no sample size calculation was performed, authors should report why the sample size is adequate to measure their effect size.
 

no
  
2. Are statistical tests justified as appropriate for every figure?  
Where (section, paragraph #)?
 

yes, Results paragraphs 1-17 and figure legends

  - a. If there is a section summarizing the statistical methods in the methods, is the statistical test for each experiment clearly defined?  

yes, para 27
  - b. Do the data meet the assumptions of the specific statistical test you chose (e.g. normality for a parametric test)?  
Where is this described (section, paragraph #)?  

Data were assumed to be normal but this was not formally tested. Methods para 27
  - c. Is there any estimate of variance within each group of data?  
Is the variance similar between groups that are being statistically compared?  
Where is this described (section, paragraph #)?  

Yes, results para 2 and methods para 27
  - d. Are tests specified as one- or two-sided?  

yes, all tests are two-sided
  - e. Are there adjustments for multiple comparisons?  

yes
  
3. Are criteria for excluding data points reported?  
Was this criterion established prior to data collection?  
Where is this described (section, paragraph #)?  

no, all data were included
  
4. Define the method of randomization used to assign subjects (or samples) to the experimental groups and to collect and process data.  
If no randomization was used, state so.  
Where does this appear (section, paragraph #)?  

Mice were randomly assigned to either ChR2 or eYFP groups for optogenetics experiments. Methods paragraph 2.

Mice were randomly assigned to either Lesion or Sham groups for SC lesion experiment. Methods paragraph 7.

Drug order was randomized for Fig 3. Methods para 15.

Optogenetic stimulation was randomized between mice. methods para. 19

5. Is a statement of the extent to which investigator knew the group allocation during the experiment and in assessing outcome included?  
If no blinding was done, state so.  
Where (section, paragraph #)?
6. For experiments in live vertebrates, is a statement of compliance with ethical guidelines/regulations included?  
Where (section, paragraph #)?
7. Is the species of the animals used reported?  
Where (section, paragraph #)?
8. Is the strain of the animals (including background strains of KO/transgenic animals used) reported?  
Where (section, paragraph #)?
9. Is the sex of the animals/subjects used reported?  
Where (section, paragraph #)?
10. Is the age of the animals/subjects reported?  
Where (section, paragraph #)?
11. For animals housed in a vivarium, is the light/dark cycle reported?  
Where (section, paragraph #)?
12. For animals housed in a vivarium, is the housing group (i.e. number of animals per cage) reported?  
Where (section, paragraph #)?
13. For behavioral experiments, is the time of day reported (e.g. light or dark cycle)?  
Where (section, paragraph #)?
14. Is the previous history of the animals/subjects (e.g. prior drug administration, surgery, behavioral testing) reported?  
Where (section, paragraph #)?
- a. If multiple behavioral tests were conducted in the same group of animals, is this reported?  
Where (section, paragraph #)?
15. If any animals/subjects were excluded from analysis, is this reported?  
Where (section, paragraph #)?
- motion tracking experiments, and headfix behavior scoring were performed by researchers blinded to group identity. All other data collection and analysis were not performed blind to the conditions of the experiments. methods para 23
- yes, methods para 1
- yes, methods para 3-7
- yes, methods para 1
- yes, methods para 1
- yes, methods para 12,16
- none were excluded

a. How were the criteria for exclusion defined?

n/a

Where is this described (section, paragraph #)?

b. Specify reasons for any discrepancy between the number of animals at the beginning and end of the study.

n/a

Where is this described (section, paragraph #)?

## ▶ Reagents

1. Have antibodies been validated for use in the system under study (assay and species)?

yes

a. Is antibody catalog number given?

yes, methods para 16

Where does this appear (section, paragraph #)?

b. Where were the validation data reported (citation, supplementary information, Antibodypedia)?

antibodies were validated in the manuscript

Where does this appear (section, paragraph #)?

2. If cell lines were used to reflect the properties of a particular tissue or disease state, is their source identified?

n/a

Where (section, paragraph #)?

a. Were they recently authenticated?

n/a

Where is this information reported (section, paragraph #)?

## ▶ Data deposition

Data deposition in a public repository is mandatory for:

- Protein, DNA and RNA sequences
- Macromolecular structures
- Crystallographic data for small molecules
- Microarray data

Deposition is strongly recommended for many other datasets for which structured public repositories exist; more details on our data policy are available [here](#). We encourage the provision of other source data in supplementary information or in unstructured repositories such as [Figshare](#) and [Dryad](#).

We encourage publication of Data Descriptors (see [Scientific Data](#)) to maximize data reuse.

1. Are accession codes for deposit dates provided?

n/a

Where (section, paragraph #)?

## ▶ Computer code/software

Any custom algorithm/software that is central to the methods must be supplied by the authors in a usable and readable form for readers at the time of publication. However, referees may ask for this information at any time during the review process.

- |                                                                                                                                                                                                                                                                                                                       |                                                                                                                                               |
|-----------------------------------------------------------------------------------------------------------------------------------------------------------------------------------------------------------------------------------------------------------------------------------------------------------------------|-----------------------------------------------------------------------------------------------------------------------------------------------|
| <p>1. Identify all custom software or scripts that were required to conduct the study and where in the procedures each was used.</p>                                                                                                                                                                                  | <p>Custom matlab and labview codes were used to control the laser and trigger stimulation when mice contacted the lick spout (Figs. 5-7).</p> |
| <p>2. If computer code was used to generate results that are central to the paper's conclusions, include a statement in the Methods section under "<b>Code availability</b>" to indicate whether and how the code can be accessed. Include version information as necessary and any restrictions on availability.</p> | <p>Matlab and Labview codes for controlling laser and triggering stimulation when mice contact lick spout are available upon request.</p>     |

## ▶ Human subjects

- |                                                                                                                                                         |            |
|---------------------------------------------------------------------------------------------------------------------------------------------------------|------------|
| <p>1. Which IRB approved the protocol?<br/>Where is this stated (section, paragraph #)?</p>                                                             | <p>n/a</p> |
| <p>2. Is demographic information on all subjects provided?<br/>Where (section, paragraph #)?</p>                                                        | <p>n/a</p> |
| <p>3. Is the number of human subjects, their age and sex clearly defined?<br/>Where (section, paragraph #)?</p>                                         | <p>n/a</p> |
| <p>4. Are the inclusion and exclusion criteria (if any) clearly specified?<br/>Where (section, paragraph #)?</p>                                        | <p>n/a</p> |
| <p>5. How well were the groups matched?<br/>Where is this information described (section, paragraph #)?</p>                                             | <p>n/a</p> |
| <p>6. Is a statement included confirming that informed consent was obtained from all subjects?<br/>Where (section, paragraph #)?</p>                    | <p>n/a</p> |
| <p>7. For publication of patient photos, is a statement included confirming that consent to publish was obtained?<br/>Where (section, paragraph #)?</p> | <p>n/a</p> |



## ► fMRI studies

For papers reporting functional imaging (fMRI) results please ensure that these minimal reporting guidelines are met and that all this information is clearly provided in the methods:

1. Were any subjects scanned but then rejected for the analysis after the data was collected? 
  - a. If yes, is the number rejected and reasons for rejection described? 

Where (section, paragraph #)?
2. Is the number of blocks, trials or experimental units per session and/or subjects specified? 

Where (section, paragraph #)?
3. Is the length of each trial and interval between trials specified?
4. Is a blocked, event-related, or mixed design being used? If applicable, please specify the block length or how the event-related or mixed design was optimized.
5. Is the task design clearly described? 

Where (section, paragraph #)?
6. How was behavioral performance measured?
7. Is an ANOVA or factorial design being used?
8. For data acquisition, is a whole brain scan used? 

If not, state area of acquisition.

  - a. How was this region determined?
9. Is the field strength (in Tesla) of the MRI system stated? 
  - a. Is the pulse sequence type (gradient/spin echo, EPI/spiral) stated?
  - b. Are the field-of-view, matrix size, slice thickness, and TE/TR/flip angle clearly stated?
10. Are the software and specific parameters (model/functions, smoothing kernel size if applicable, etc.) used for data processing and pre-processing clearly stated?

11. Is the coordinate space for the anatomical/functional imaging data clearly defined as subject/native space or standardized stereotaxic space, e.g., original Talairach, MNI305, ICBM152, etc? Where (section, paragraph #)? n/a
12. If there was data normalization/standardization to a specific space template, are the type of transformation (linear vs. nonlinear) used and image types being transformed clearly described? Where (section, paragraph #)? n/a
13. How were anatomical locations determined, e.g., via an automated labeling algorithm (AAL), standardized coordinate database (Talairach daemon), probabilistic atlases, etc.? n/a
14. Were any additional regressors (behavioral covariates, motion etc) used? n/a
15. Is the contrast construction clearly defined? n/a
16. Is a mixed/random effects or fixed inference used? n/a
- a. If fixed effects inference used, is this justified? n/a
17. Were repeated measures used (multiple measurements per subject)? n/a
- a. If so, are the method to account for within subject correlation and the assumptions made about variance clearly stated? n/a
18. If the threshold used for inference and visualization in figures varies, is this clearly stated? n/a
19. Are statistical inferences corrected for multiple comparisons? n/a
- a. If not, is this labeled as uncorrected? n/a
20. Are the results based on an ROI (region of interest) analysis? n/a
- a. If so, is the rationale clearly described? n/a
- b. How were the ROI's defined (functional vs anatomical localization)? n/a
21. Is there correction for multiple comparisons within each voxel? n/a
22. For cluster-wise significance, is the cluster-defining threshold and the corrected significance level defined? n/a

## ▶ Additional comments

---

Additional Comments
